# Supplementary material for: Analysis of competitive binding of several metal cations by graphene oxide reveals the quantity and spatial distribution of carboxyl groups on its surface
Source: Royal Society of Chemistry journal article supplement (doi:10.1039/c7cp07055a), 2017-12-12
Supplement: c7cp07055a1.pdf [file c7cp07055a1.pdf]

### Supplementary Information for

#### Analysis of competitive binding of several metal cations by graphene oxide reveals the quantity and spatial distribution of carboxyl groups on its surface

*Rustem R. Amirov,\* Julia Shayimova, Zarina Nasirova, Alexander Solodov, and Ayrat M. Dimiev\**

*Laboratory for Advanced Carbon Nanomaterials, Chemical Institute, Kazan Federal University,  
Kremlyovskaya str. 18, Kazan 420008, Russian Federation*

Corresponding authors: Rustem Amirov, e-mail: ramirov@kpfu.ru, and Ayrat Dimiev, e-mail: dimiev.labs@gmail.com

#### 1. Quantitative determination of Gd(III) content in supernatants.

The quantitative determination of Gd<sup>3+</sup> in supernatants was conducted spectrophotometrically with the indicator Xylenol Orange. Administration of Gd<sup>3+</sup> into the indicator solution in the presence of the acetate buffer (pH=5.2) results in changing of the indicator absorption spectrum (Fig. S1).

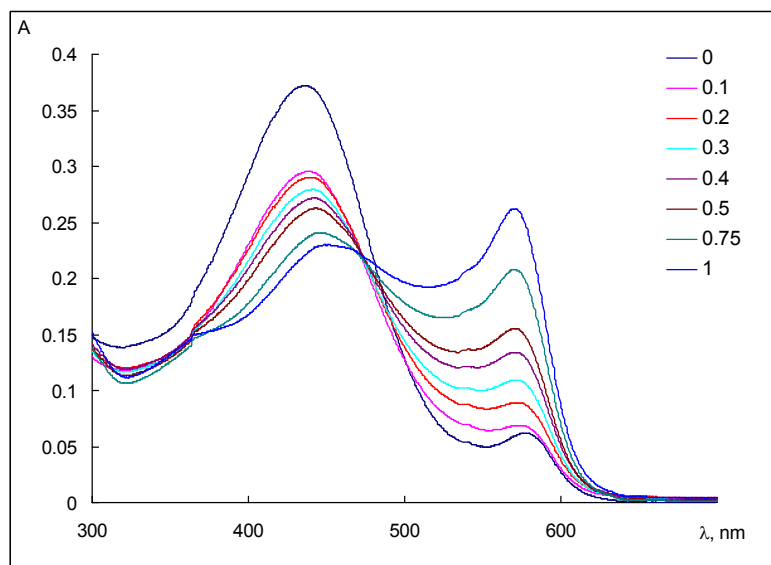

**Figure S1.** Absorption spectra of Xylenol Orange (0 mM Gd(III)) and its gadolinium complexes at varying Gd(III) concentrations (0.1-1 mM).

The intensity of the 570 nm absorption band increases, the intensity of the 430 nm absorption band decreases. The calibration curve for the  $Gd^{3+}$  concentration range from 0 through 1.0 mM was constructed with respect to the 570 nm absorption band (Fig. S2). The as-constructed calibration curve was used to determine the concentration of the free  $Gd^{3+}$  ions in the supernatants separated from the  $Gd^{3+}$ -GO solutions (Table 1 of the main text).

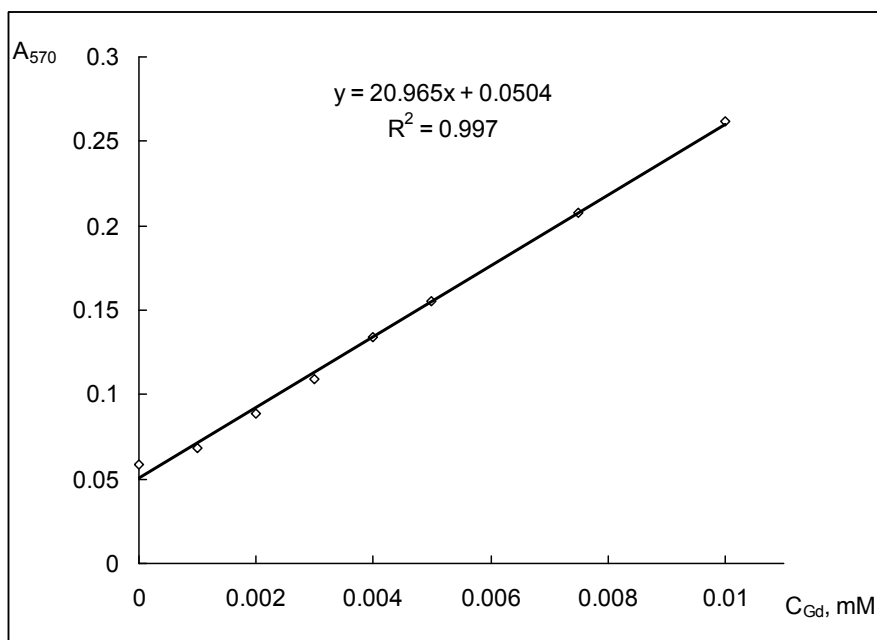

**Figure S2.** Calibration curve for absorption of the Xylenol Orange solutions; measured at 570 nm (based on absorption spectra from Fig. S1).

## 2. Additional Figures

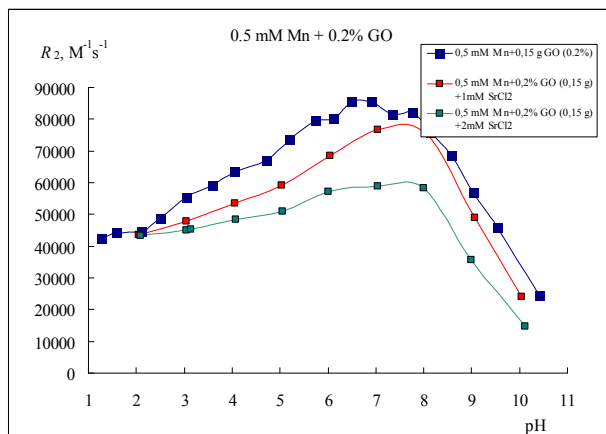

**Figure S3.** The function of the spin-spin relaxivity ( $R_2$ ) of the aqueous Mn(II)-GO solutions on pH. Curve (1) is for the Mn(II)-GO system; curve (2) the Mn(II)-GO system in presence of 1.0 mM Sr(II); curve (3) the Mn(II)-GO system in presence of 2.0 mM Sr(II).  $C_{\text{Mn(II)}} = 0.5 \text{ mM}$ ;  $C_{\text{GO}} = 2 \text{ wt.}\%$ .

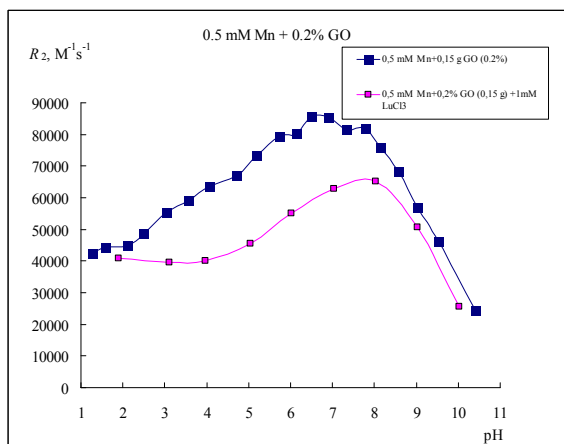

**Figure S4.** The function of the spin-spin relaxivity ( $R_2$ ) for the aqueous Mn(II)-GO solutions on pH. Curve (1) is for the Mn(II)-GO system; curve (2) the Mn(II)-GO system in presence of 1.0 mM Lu(III).  $C_{\text{Mn(II)}} = 0.5 \text{ mM}$ ;  $C_{\text{GO}} = 2 \text{ wt.}\%$ .

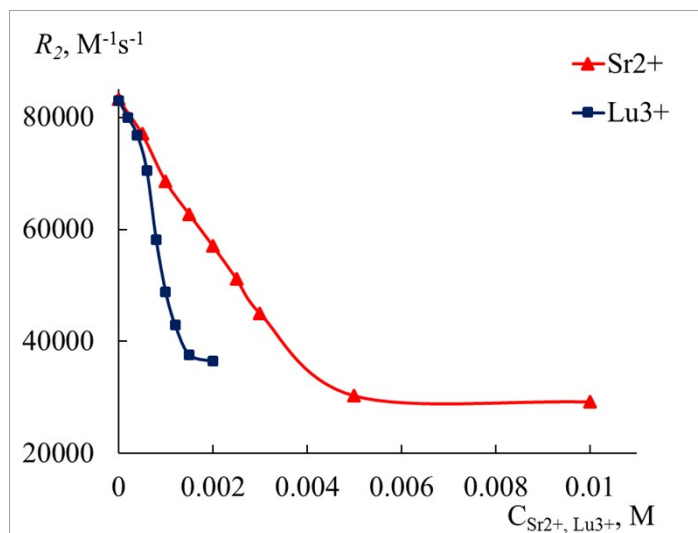

**Figure S5.** Function of the spin-spin relaxivity  $R_2$  for the Mn(II)-GO solutions on concentration of Sr(II) (red line), and Lu(III) (blue line). pH=6.  $C(\text{Mn}^{2+}) = 0.5 \text{ mM}$ ;  $C_{\text{GO}} = 0.2 \text{ wt.}\%$ .

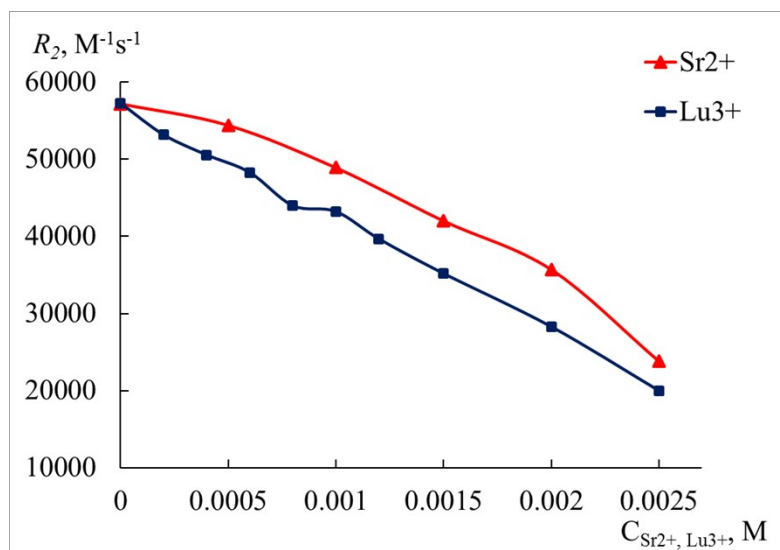

**Figure S6.** Function of the spin-spin relaxivity  $R_2$  for the Mn(II)-GO solutions on concentration of Sr(II) (red line), and Lu(III) (blue line). pH=9.  $C(\text{Mn}^{2+}) = 0.5 \text{ mM}$ ;  $C_{\text{GO}} = 0.2 \text{ wt.}\%$ .
